# Supplementary material
Source: publisher site journal article supplement (https://www.dovepress.com/article/363629)

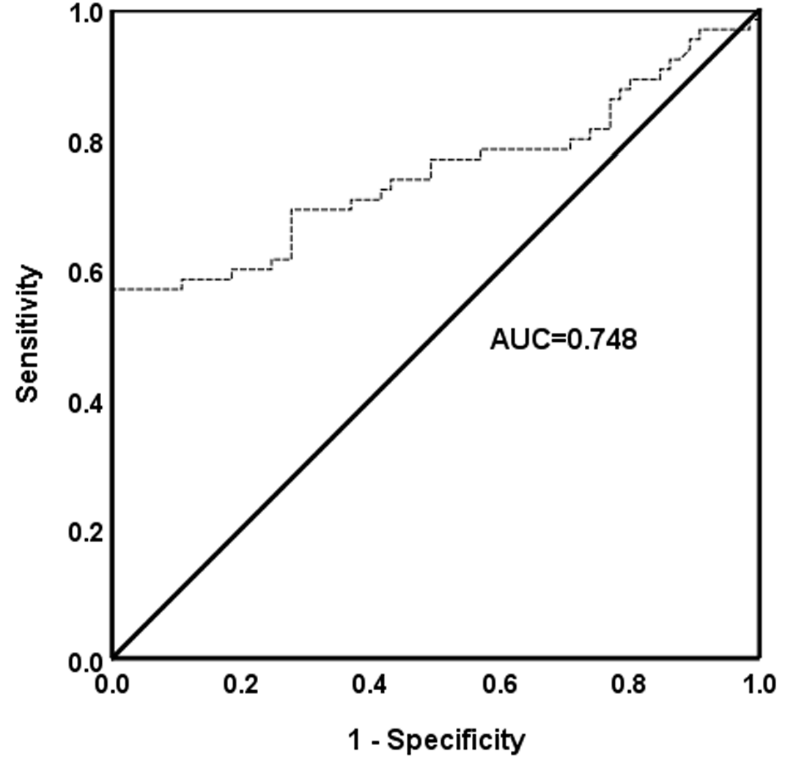


Figure legends:

Supplementary Figure.1 The ROC analysis for tiRNA-Val-CAC-001 expression level.

Supplement: Supplementary file 1 [file get_supplementary_file.php]
